# Supplementary material for: Short-Term Efficacy and Safety of Cataract Surgery Combined with Iris-Fixated Phakic Intraocular Lens Explantation: A Multicentre Study
Source: MDPI journal article supplement (doi:10.3390/jcm10163672), 2021-08-19
Supplement: s1 [file s1]

**Supplemental Table S1.** Intraocular lenses implanted during cataract surgery

| <b>IOL</b>                                                                 | <b>No.</b> |
|----------------------------------------------------------------------------|------------|
| Lentis Mplus (Teleon Surgical, Spankeren, Netherlands)                     | 17         |
| ATLisa (Carl Zeiss Meditec, Jena, Germany)                                 | 16         |
| MN60MA (Alcon, Geneva, Switzerland)                                        | 11         |
| Lentis Mplus Toric (Teleon Surgical, Spankeren, Netherlands)               | 9          |
| XY1 (HOYA, Tokyo, Japan)                                                   | 6          |
| ZCB00 (AMO Japan, Tokyo, Japan)                                            | 5          |
| ZCB00V (AMO Japan, Tokyo, Japan)                                           | 5          |
| MA60MA (Alcon, Geneva, Switzerland)                                        | 3          |
| Acriva Trinova Toric (VSY Biotechnology, Leinfelden-Echterdingen, Germany) | 2          |
| ALSAFIT (Alsanza Medizintechnik und Pharma GmbH, Pfullingen, Germany)      | 2          |
| ATLisa Toric (Carl Zeiss Meditec, Jena, Germany)                           | 3          |
| Lentis Mplus Toric MF20 (Teleon Surgical, Spankeren, Netherlands)          | 2          |
| Lentis MplusX (Teleon Surgical, Spankeren, Netherlands)                    | 2          |
| SND1T4 (Alcon, Geneva, Switzerland)                                        | 2          |
| ZCV300 (AMO Japan, Tokyo, Japan)                                           | 2          |
| FineVision (PhysIOL, Liège, Belgium)                                       | 1          |
| Lentis MplusX Toric (Teleon Surgical, Spankeren, Netherlands)              | 1          |
| MN60AC (Alcon, Geneva, Switzerland)                                        | 1          |
| PCB00V (AMO Japan, Tokyo, Japan)                                           | 1          |
| RayOne (Rayner, West Sussex, United Kingdom)                               | 1          |
| SN60WF (Alcon, Geneva, Switzerland)                                        | 1          |
| SN6AT5 (Alcon, Geneva, Switzerland)                                        | 1          |
| ZCV150 (AMO Japan, Tokyo, Japan)                                           | 1          |
| ZMB00 (Alcon, Geneva, Switzerland)                                         | 1          |

IOL, intraocular lens.

**Supplemental Figure S1.** Comparison of subjective astigmatism between the pIOL materials.

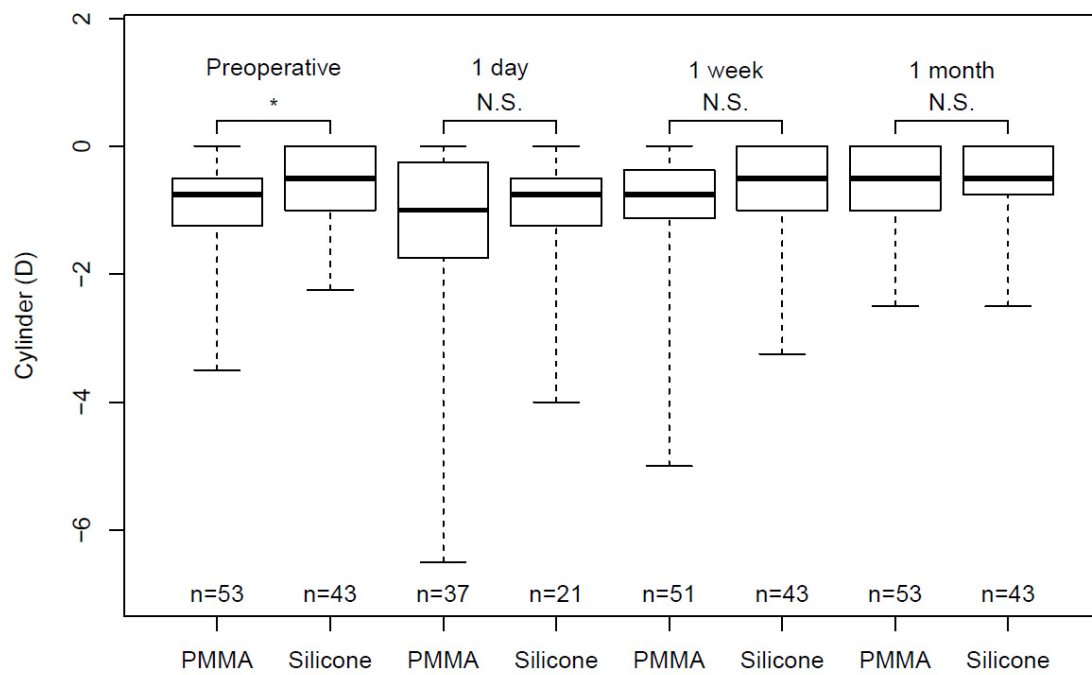

\* indicates a significant difference between baseline and each time point. N.S., not significant; D, diopters; PMMA, polymethyl methacrylate; pIOL, phakic intraocular lens.
